# Supplementary material for: Toward a new definition of surface energy for late transition metals
Source: Royal Society of Chemistry journal article supplement (doi:10.1039/d2cp04024g), 2022-12-12
Supplement: d2cp04024g1.pdf [file d2cp04024g1.pdf]

## SUPPORTING INFORMATION FOR: “TOWARD A NEW DEFINITION OF THE SURFACE ENERGY OF LATE TRANSITION METALS”

Alexandre Boucher,<sup>a</sup> Glenn Jones<sup>b</sup> and Alberto Roldan<sup>a</sup>

<sup>a</sup> Cardiff Catalysis Institute, School of Chemistry, Cardiff University, Main Building, Park Place, Cardiff, CF10 3AT, Wales, United Kingdom.

<sup>b</sup> Johnson Matthey Technology Center, Blounts Ct Rd, Sonning Common, Reading RG4 9NH, United Kingdom.

### Content:

- Table S1: Lorentzian parameters for surface area and surface energy of transition metals.
- Table S2: Validation set for Lorentzian trends.
- Table S3: Surface energy of low-index fcc-surfaces computed from DFT + tiling scheme, predicted and from literature.

Table S1: Lorentzian parameters for surface area and surface energy of transition metals.

This table shows the parameters of the Lorentzian equation describing the surface area of an atom (Å<sup>2</sup>) and its surface energy (J/m<sup>2</sup>) as a function of its CN. Lorentzian functions have the following form:

$$f(CN) = a - \frac{b + CN^c}{d} \#(1)$$

Where in this work parameters  $a$ ,  $b$ ,  $c$  and  $d$  were obtained from fitting functions available in the SciPy Python package.

| Area parameters           |           |                   |         |                    |                |
|---------------------------|-----------|-------------------|---------|--------------------|----------------|
| Metal                     | a         | b                 | c       | d                  | R <sup>2</sup> |
| Pd                        | 114.7918  | 57.4572           | 0.7181  | 0.5759             | 0.9794         |
| Ag                        | 17.8015   | 4.6483            | 1.1138  | 1.5625             | 0.9621         |
| Ir                        | 9.9810    | -5.1590           | 2.2389  | 380784             | 0.8317         |
| Cu                        | 675.4554  | -1.0408           | -0.0005 | -0.0001            | 0.9423         |
| Pt                        | 5.6015    | -3.8436           | 0.5865  | 0.3142             | 0.9528         |
| Au                        | -21.0411  | -72.2115          | 1.1591  | 2.1030             | 0.9559         |
| Ru hcp                    | 9.9397    | -3.1276           | 2.5862  | 78.6354            | 0.9852         |
| Ru fcc                    | 7.1547    | 107685.4046       | 6.7125  | 4079328.7943       | 0.8195         |
| W                         | 9.1743    | -514.4266         | 4.0125  | 449.9303           | 0.9829         |
| Surface energy parameters |           |                   |         |                    |                |
| Pd                        | 2.5958    | -1897.0355        | 4.4287  | 22118.5298         | 0.9771         |
| Ag                        | 1.9391    | -5.9966           | 1.1345  | 6.0697             | 0.9390         |
| Ir                        | 33.5081   | 438.5018          | 1.9294  | 16.6052            | 0.9701         |
| Cu                        | 2.2952    | 514500807741.7106 | 12.3881 | 9899241901288.1400 | 0.7406         |
| Pt                        | 4.2498    | -16.4891          | 2.6691  | 163.9623           | 0.9783         |
| Au                        | 2.3787    | 31.0056           | 2.8897  | 556.5603           | 0.9913         |
| Ru hcp                    | 3.9568    | 6723228.021       | 9.1560  | 1951497087.0471    | 0.9868         |
| Ru fcc                    | -184.1913 | -237.9911         | 1.0567  | 1.2188             | 0.9745         |
| W                         | 4.3964    | -7669.2043        | 7.0222  | 490623.7437        | 0.9418         |

Table 1: Lorentzian parameters describing the surface area and surface energy of transition metal atoms forming a surface.

Table S2: Validation set for Lorentzian trends.

The table provide details on the nature of the slabs used in the validation set for the metal slabs. Predictions were obtained using the parameters given in the table S1 and the average CN on the surface of the slab,  $\langle CN \rangle$ :

$$\gamma_{val} = a - \frac{b + \langle CN \rangle^c}{d} \#(2)$$

| Metal | Surface, dimension | Defect                   | DFT- $\gamma$ (J/m <sup>2</sup> ) | Predicted- $\gamma$ (J/m <sup>2</sup> ) |
|-------|--------------------|--------------------------|-----------------------------------|-----------------------------------------|
| Ir    | (100), 5x5         | 1 adatom                 | 3.545                             | 3.430                                   |
| Ir    |                    | 2 adatoms                | 3.738                             | 3.653                                   |
| Ir    |                    | 3 adatoms                | 3.685                             | 3.597                                   |
| Ir    | (100), 5x5         | Pristine                 | 3.218                             | 2.863                                   |
| Ir    |                    | 1 vacancy                | 3.232                             | 2.899                                   |
| Ir    | (014), 1x3         | Pristine                 | 3.381                             | 3.084                                   |
| Ir    | (611), 1x3         | Pristine                 | 3.244                             | 2.863                                   |
| Pd    | (100), 5x5         | 2 vacancies              | 2.001                             | 2.136                                   |
| Pd    |                    | 4 adatoms, square        | 1.947                             | 2.192                                   |
| Pd    |                    | 1 adatom                 | 2.137                             | 2.229                                   |
| Pd    |                    | 2 adatoms                | 2.123                             | 2.210                                   |
| Pd    |                    | 5 adatoms, tetrahedron   | 2.137                             | 2.193                                   |
| Pd    | (111), 5x5         | 3 vacancies, linear      | 1.916                             | 1.945                                   |
| Pd    |                    | 2 vacancies non-adjacent | 1.545                             | 1.919                                   |
| Pd    |                    | 3 vacancies, triangular  | 1.947                             | 1.959                                   |
| Pd    | (110), 3x4         | Pristine                 | 1.881                             | 1.950                                   |
| Pd    |                    | 1 vacancy                | 1.890                             | 1.980                                   |
| Pd    |                    | 2 vacancies              | 1.863                             | 1.919                                   |
| Pd    | (210), 3x3         | Pristine                 | 2.020                             | 2.090                                   |
| Pd    | (310), 3x3         | Pristine                 | 2.002                             | 2.037                                   |
| Pd    | (730), 1x4         | Pristine                 | 2.018                             | 2.067                                   |
| Pd    | (311), 2x4         | Pristine                 | 1.926                             | 1.919                                   |
| Pt    | (100), 5x5         | 1 adatom                 | 2.702                             | 2.782                                   |
| Pt    |                    | 2 adatoms                | 2.682                             | 2.743                                   |
| Pt    |                    | 3 adatoms                | 2.646                             | 2.706                                   |
| Pt    | (100), 5x5         | Pristine                 | 2.405                             | 2.202                                   |
| Pt    |                    | 1 vacancy                | 2.398                             | 2.227                                   |
| Pt    | (014), 1x3         | Pristine                 | 2.429                             | 2.358                                   |
| Pt    | (611), 1x3         | Pristine                 | 2.353                             | 2.202                                   |
| Cu    | (100), 5x5         | 1 adatom                 | 2.304                             | 2.228                                   |
| Cu    |                    | 2 adatoms                | 2.285                             | 2.226                                   |
| Cu    |                    | 3 adatoms                | 2.263                             | 2.224                                   |
| Cu    | (100), 5x5         | Pristine                 | 1.992                             | 2.176                                   |
| Cu    |                    | 1 vacancy                | 2.164                             | 2.180                                   |
| Cu    | (014), 1x3         | Pristine                 | 2.195                             | 2.196                                   |
| Cu    | (611), 1x3         | Pristine                 | 2.120                             | 2.176                                   |
| Ag    | (100), 5x5         | 1 adatom                 | 1.283                             | 1.184                                   |
| Ag    |                    | 2 adatoms                | 1.278                             | 1.165                                   |
| Ag    |                    | 3 adatoms                | 1.271                             | 1.148                                   |
| Ag    | (100), 5x5         | Pristine                 | 1.130                             | 0.934                                   |
| Ag    |                    | 1 vacancy                | 1.137                             | 0.944                                   |
| Ag    | (014), 1x3         | Pristine                 | 1.218                             | 0.997                                   |

|                |            |             |       |       |
|----------------|------------|-------------|-------|-------|
| <b>Ag</b>      | (611), 1x3 | Pristine    | 1.180 | 0.934 |
| <b>Au</b>      | (100), 5x5 | 1 adatom    | 1.513 | 1.592 |
| <b>Au</b>      |            | 2 adatoms   | 1.502 | 1.172 |
| <b>Au</b>      |            | 3 adatoms   | 1.491 | 1.553 |
| <b>Au</b>      | (100), 5x5 | Pristine    | 1.343 | 1.295 |
| <b>Au</b>      |            | 1 vacancy   | 1.350 | 1.308 |
| <b>Au</b>      | (014), 1x3 | Pristine    | 1.400 | 1.375 |
| <b>Au</b>      | (611), 1x3 | Pristine    | 1.363 | 1.295 |
| <b>Ru, fcc</b> | (111), 5x5 | 2 vacancies | 2.912 | 2.746 |
| <b>Ru, fcc</b> |            | 3 vacancies | 2.896 | 2.817 |
| <b>Ru, fcc</b> | (100), 5x5 | 1 adatom    | 3.674 | 3.690 |
| <b>Ru, fcc</b> |            | 2 adatoms   | 3.612 | 3.618 |
| <b>Ru, fcc</b> |            | 3 adatoms   | 3.561 | 3.376 |
| <b>Ru, fcc</b> | (611), 1x3 | Pristine    | 3.104 | 2.711 |
| <b>Ru, hcp</b> | (010), 3x4 | Pristine    | 3.685 | 3.802 |
| <b>Ru, hcp</b> |            | 1 vacancy   | 3.472 | 3.787 |
| <b>Ru, hcp</b> | (011), 4x3 | 1 vacancy   | 3.528 | 3.724 |
| <b>Ru, hcp</b> |            | 2 vacancies | 3.430 | 3.707 |
| <b>Ru, hcp</b> | (012), 4x2 | Pristine    | 3.432 | 3.715 |
| <b>Ru, hcp</b> | (023), 4x1 | Pristine    | 3.538 | 3.727 |
| <b>W</b>       | (013), 4x1 | Pristine    | 4.449 | 4.247 |
| <b>W</b>       | (121), 4x2 | Pristine    | 3.934 | 3.818 |
| <b>W</b>       | (210), 2x4 | Pristine    | 4.407 | 4.152 |
| <b>W</b>       | (110), 3x4 | 1 adatom    | 4.185 | 3.760 |
| <b>W</b>       |            | 2 adatoms   | 4.237 | 3.760 |
| <b>W</b>       |            | 3 adatoms   | 4.188 | 3.870 |
| <b>W</b>       | (111), 3x4 | Pristine    | 4.185 | 3.818 |
| <b>W</b>       |            | 1 vacancy   | 3.911 | 3.703 |

Table 2: Slabs used to validate the Lorentzian trends predicting surface energy of a metal atom on a slab.

Table S3: Surface energy of low-index fcc-surfaces computed from DFT + tiling scheme, predicted and from literature.

The table S3 compares the surface energies of low-index surfaces of fcc-metals ((111), (001) and (110) surfaces) predicted by 1) the Lorentzian trends, 2) the DFT + tiling scheme developed in this work, and 3) the surface energy taken from literature (Vitos *et al.*, ref. 26 on the main article).

|                | $\gamma$ -prediction (J/m <sup>2</sup> ) | $\gamma$ -DFT (J/m <sup>2</sup> ) | $\gamma$ -literature (J/m <sup>2</sup> ) |
|----------------|------------------------------------------|-----------------------------------|------------------------------------------|
| <b>Ir(111)</b> | 2.863                                    | 3.280                             | 2.971                                    |
| <b>Ir(100)</b> | 3.818                                    | 3.712                             | 3.722                                    |
| <b>Ir(110)</b> | 2.863                                    | 3.218                             | 3.606                                    |
| <b>Pd(111)</b> | 1.919                                    | 2.003                             | 1.920                                    |
| <b>Pd(100)</b> | 2.229                                    | 2.130                             | 2.326                                    |
| <b>Pd(110)</b> | 1.919                                    | 1.863                             | 2.225                                    |
| <b>Pt(111)</b> | 2.202                                    | 2.402                             | 2.229                                    |
| <b>Pt(100)</b> | 2.782                                    | 2.723                             | 2.734                                    |

|                |       |       |       |
|----------------|-------|-------|-------|
| <b>Pt(110)</b> | 2.202 | 2.405 | 2.819 |
| <b>Cu(111)</b> | 2.176 | 2.210 | 1.952 |
| <b>Cu(100)</b> | 2.228 | 2.292 | 2.166 |
| <b>Cu(110)</b> | 2.176 | 2.192 | 2.237 |
| <b>Ag(111)</b> | 0.934 | 1.218 | 1.172 |
| <b>Ag(100)</b> | 1.184 | 1.210 | 1.200 |
| <b>Ag(110)</b> | 0.934 | 1.130 | 1.238 |
| <b>Au(111)</b> | 1.295 | 1.367 | 1.283 |
| <b>Au(100)</b> | 1.592 | 1.510 | 1.627 |
| <b>Au(110)</b> | 1.295 | 1.343 | 1.321 |

*Table 3: Comparison of the fcc low-index surface energy predicted by the Lorentzian trends, DFT + tiling scheme vs. the literature data taken from Vitos et al.*
